# Supplementary material for: Neuroprotection by α2-Adrenergic Receptor Stimulation after Excitotoxic Retinal Injury: A Study of the Total Population of Retinal Ganglion Cells and Their Distribution in the Chicken Retina
Source: PLOS journal article supplement (doi:10.1371/journal.pone.0161862), 2016-09-09
Supplement: S1 (10.1371/journal.pone.0161862.s001) [file journal.pone.0161862.s001]

**S1 Fig. Micrographs of Brn3a+ RGC in flat-mount retina 7 days after NMDA administration with BMD pretreatment and control.**

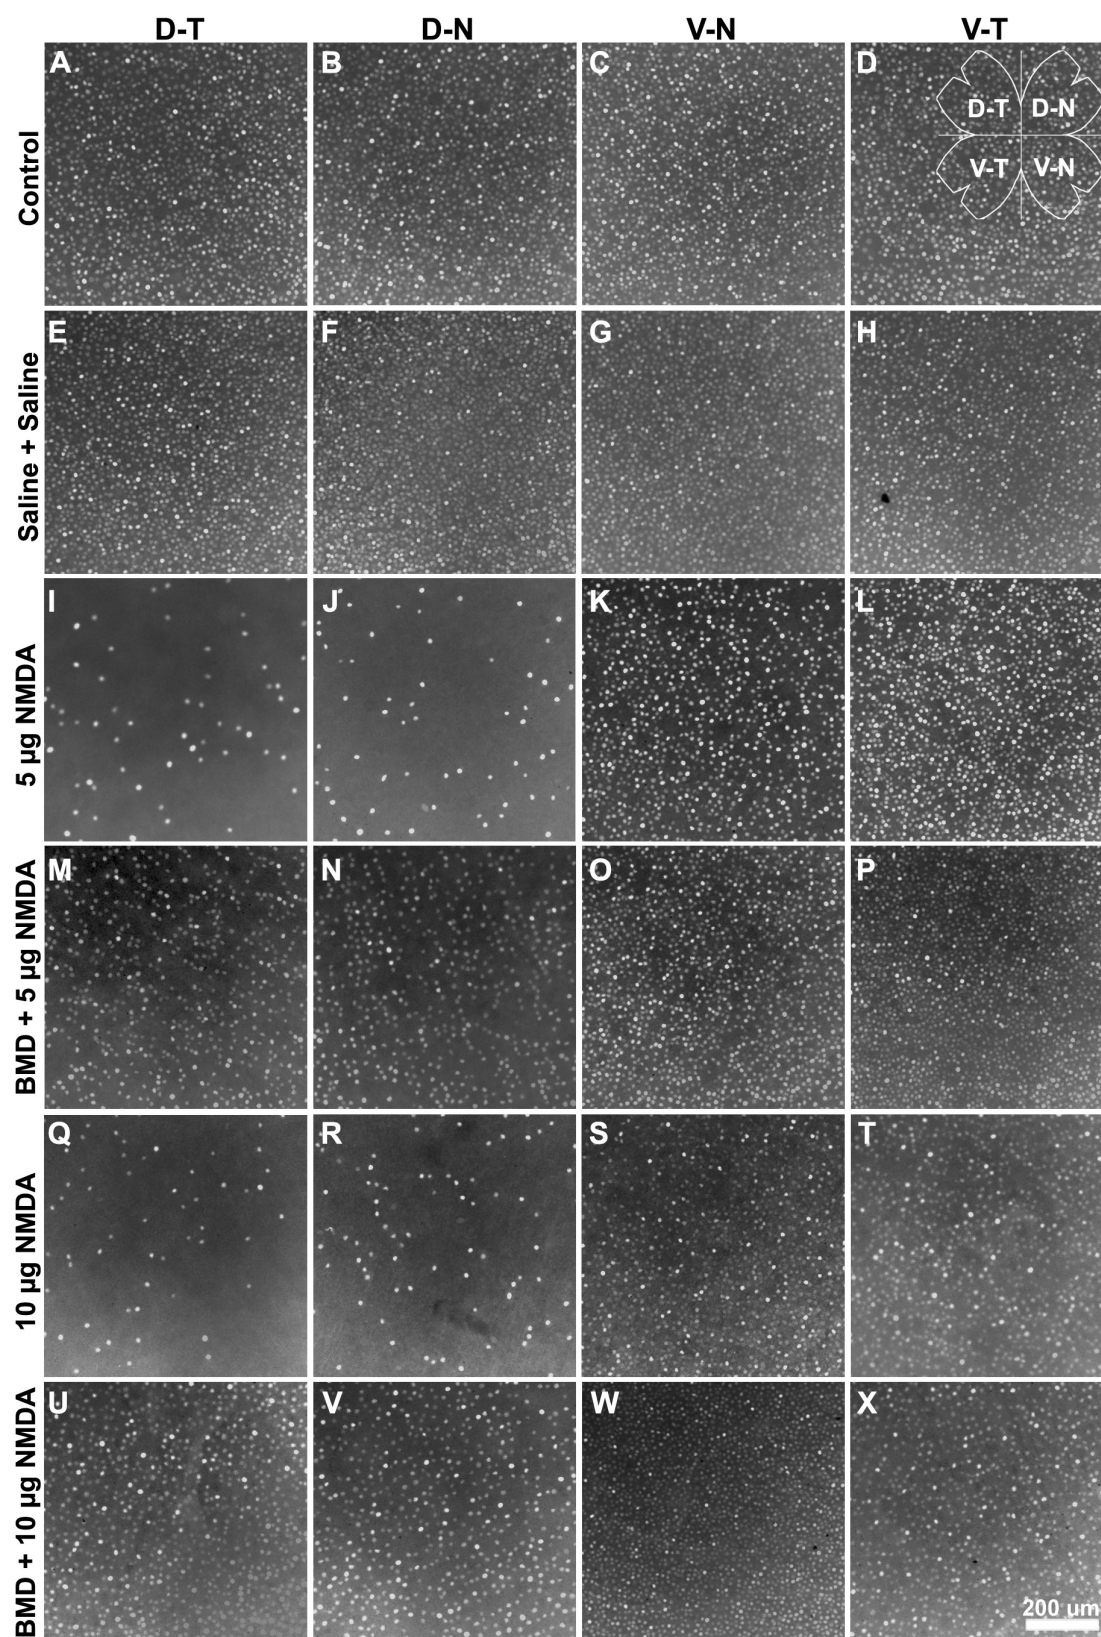

Representative fluorescence micrographs of Brn3a<sup>+</sup> cells in the quadrants of flat-mounted retina at 7 days post-lesion. (A-D) Normal control retina with schematic diagram of the four retinal quadrants in panel D. Experimental groups were: (E-H) Injections of saline + saline, (I-L) saline + 5 µg NMDA, (M-P) brimonidine + 5 µg of NMDA, (Q-T) saline + 10 µg of NMDA, and (U-X) brimonidine + 10 µg of NMDA. BMD; brimonidine, D-T; dorso-temporal, D-N; dorso-nasal, V-N; ventro-nasal, V-T; ventro-temporal.
